# Supplementary material for: High-Flow Nasal Cannula versus Noninvasive Positive Pressure Ventilation in Patients with Heart Failure after Extubation: An Observational Cohort Study
Source: Hindawi journal article supplement (doi:10.1155/2020/6736475), 2020-07-03
Supplement: f1 [file 6736475.f1.pdf]

## Supplementary Materials

**Supplement 1.** Arterial blood gas (ABG) data before extubation and at the time of treatment failure in patients with treatment failure

| NO.             | Group | Diagnosis             | Type of treatment failure | Pre-extubation ABG |                   |                  |                               |      |                         |                  |          | ABG at treatment failure |                   |                  |                               |      |                         |                  |          |
|-----------------|-------|-----------------------|---------------------------|--------------------|-------------------|------------------|-------------------------------|------|-------------------------|------------------|----------|--------------------------|-------------------|------------------|-------------------------------|------|-------------------------|------------------|----------|
|                 |       |                       |                           | pH                 | PaCO <sub>2</sub> | PaO <sub>2</sub> | HCO <sub>3</sub> <sup>-</sup> | BE   | SaO <sub>2</sub>        | FiO <sub>2</sub> | PF ratio | PH                       | PaCO <sub>2</sub> | PaO <sub>2</sub> | HCO <sub>3</sub> <sup>-</sup> | BE   | SaO <sub>2</sub>        | FiO <sub>2</sub> | PF ratio |
| 1               | HFNC  | Pneumonia             | Hypoxemia                 | 7.472              | 33.4              | 144.2            | 23.9                          | 0.7  | 98.7                    | 40               | 360.5    | 7.545                    | 27.8              | 57.5             | 23.5                          | 1.4  | 90.8                    | 50               | 115      |
| 2 <sup>a</sup>  | HFNC  | ADHF                  | Hypoxemia                 |                    |                   |                  |                               |      | SpO <sub>2</sub><br>99  | 40               |          | 7.516                    | 29.8              | 51.7             | 23.6                          | 1.6  | 86.4                    | 70               | 73.86    |
| 3               | HFNC  | Pneumonia             | Hypoxemia                 | 7.402              | 23.7              | 130.1            | 14.4                          | 9.1  | 98.9                    | 40               | 325.3    | 7.493                    | 29                | 41.2             | 21.8                          | -0.9 | 73.6                    | 60               | 68.67    |
| 4               | HFNC  | Pneumonia             | Hypoxemia                 | 7.5                | 33.2              | 73.5             | 25.3                          | 2.5  | 96                      | 30               | 245      | 7.49                     | 34.4              | 53.3             | 26.1                          | 3.1  | 87.8                    | 60               | 88.83    |
| 5               | HFNC  | ADHF                  | Hypercapnia               | 7.379              | 51.9              | 132.6            | 29.9                          | 4    | 59.5                    | 40               | 331.5    | 7.32                     | 57.1              | 63.9             | 28.8                          | 1.9  | 59.5                    | 70               | 91.29    |
| 6               | HFNC  | Pneumonia             | Hypoxemia                 | 7.387              | 27.2              | 166.3            | 16                            | -7.7 | 99                      | 40               | 415.8    | 7.44                     | 32.6              | 56.4             | 21.8                          | -1.7 | 88.2                    | 50               | 112.8    |
| 7               | HFNC  | Pneumonia             | Hypoxemia                 | 7.502              | 38.2              | 140.6            | 29.3                          | 5.7  | 98.7                    | 40               | 351.5    | 7.445                    | 40.3              | 67.1             | 24.8                          | -0.1 | 90.9                    | 60               | 111.8    |
| 8 <sup>a</sup>  | HFNC  | Extrapulmonary Sepsis | Hypercapnia               |                    |                   |                  |                               |      | SpO <sub>2</sub><br>99% | 40               |          | 7.196                    | 75.2              | 63.3             | 28.5                          | -1.4 | 89.7                    | 70               | 90.43    |
| 9               | HFNC  | Pneumonia             | Hypoxemia                 | 7.457              | 41.1              | 103.6            | 28.4                          | 4.2  | 98                      | 30               | 345.3    | 7.46                     | 40.3              | 38.7             | 28                            | 3.9  | 75.8                    | 70               | 55.29    |
| 10              | HFNC  | Pneumonia             | Hypercapnia               | 7.422              | 38.6              | 174.8            | 24.6                          | 0.2  | 99.5                    | 40               | 437      | 7.326                    | 77.3              | 53.1             | 39.5                          | 10.6 | 83.4                    | 85               | 62.47    |
| 11 <sup>b</sup> | HFNC  | ADHF                  | Hypoxemia                 | 7.361              | 38.1              | 303.5            | 21.1                          | -4   | 99.9                    | 50               | 607      |                          |                   |                  |                               |      | SpO <sub>2</sub><br>87% | 60               |          |
| 12              | HFNC  | Pneumonia             | Hypoxemia                 | 7.543              | 34                | 143              | 28.6                          | 5.9  | 99.3                    | 40               | 357.5    | 7.363                    | 51.7              | 66.1             | 28.7                          | 2.5  | 90.2                    | 70               | 94.43    |
| 13              | HFNC  | Pneumonia             | Hypoxemia                 | 7.554              | 26.2              | 170              | 22.6                          | 1.2  | 98.3                    | 40               | 425      | 7.358                    | 36.7              | 46.8             | 20.2                          | -4.7 | 81.1                    | 60               | 78       |
| 14 <sup>a</sup> | HFNC  | ADHF                  | Hypoxemia                 |                    |                   |                  |                               |      | SpO <sub>2</sub><br>98% | 30               |          | 7.44                     | 38.9              | 37.7             | 26.2                          | 2.1  | 70.8                    | 60               | 62.83    |
| 15              | HFNC  | ADHF                  | Cardiac arrest            | 7.438              | 36                | 204              | 23.8                          | -0.1 | 98.3                    | 40               | 510      | 7.477                    | 36.7              | 133              | 26.5                          | 2.9  | 99.1                    | 85               | 156.5    |

|                 |      |           |                                   |       |      |       |      |     |      |    |       |       |      |       |      |      |      |                         |       |  |
|-----------------|------|-----------|-----------------------------------|-------|------|-------|------|-----|------|----|-------|-------|------|-------|------|------|------|-------------------------|-------|--|
| 16 <sup>c</sup> | NPPV | ADHF      | Hypoxemia                         | 7.45  | 57.5 | 91.9  | 39.1 | 13  | 96.6 | 40 | 229.8 |       |      |       |      |      |      | SpO <sub>2</sub><br>89% | 60    |  |
| 17              | NPPV | Pneumonia | Excessive effort<br>for breathing | 7.343 | 42.6 | 138.4 | 22.6 | -3  | 98.4 | 40 | 346   | 7.325 | 42.7 | 130.7 | 21.8 | -4.1 | 98.4 | 40                      | 326.8 |  |
| 18              | NPPV | Pneumonia | Hypercapnia                       | 7.445 | 43.6 | 95.1  | 29.3 | 4.8 | 98.1 | 30 | 317   | 7.306 | 74.2 | 61.4  | 36.2 | 8.3  | 86.7 | 30                      | 204.7 |  |
| 19              | NPPV | COPD      | Hypercapnia                       | 7.409 | 47.1 | 95.2  | 29.1 | 3.8 | 98.1 | 40 | 238   | 7.333 | 71.6 | 79.1  | 37.2 | 8.8  | 96.6 | 40                      | 197.8 |  |
| 20              | NPPV | ADHF      | Airway protection                 | 7.479 | 51.6 | 106.5 | 37.5 | 2   | 98.3 | 40 | 266.3 | 7.384 | 67.9 | 63.4  | 39.6 | 11.7 | 92.3 | 40                      | 158.5 |  |
| 21              | NPPV | Pneumonia | Airway protection                 | 7.496 | 30.2 | 140.9 | 22.8 | 0   | 99   | 35 | 402.6 | 7.476 | 24.2 | 120.1 | 17.5 | -5   | 98.4 | 40                      | 300.3 |  |

HFNC, high-flow nasal cannula; NPPV, non-invasive positive pressure ventilation; ADHF, acute decompensated heart failure; COPD, chronic obstructive pulmonary disease; PaCO<sub>2</sub>, arterial partial pressure of carbon dioxide; PaO<sub>2</sub>, arterial partial pressure of oxygen; HCO<sub>3</sub><sup>-</sup>, bicarbonate; BE, base excess; SaO<sub>2</sub>, arterial oxygen saturation; SpO<sub>2</sub>, *peripheral capillary oxygen saturation*; FiO<sub>2</sub>, fraction of inspired oxygen; PF ratio, PaO<sub>2</sub>/FiO<sub>2</sub> ratio

<sup>a</sup> There was no ABG data before extubation, although the oxygenation status of the patient was stable.

<sup>b</sup> The SpO<sub>2</sub> of the patient dropped to 87% within a few minutes after extubation. The patient was diagnosed with hypoxemic respiratory failure by the clinician and immediately intubated, so ABG data were not available.

<sup>c</sup> The SpO<sub>2</sub> of the patient dropped to 89% within a few minutes after extubation. The patient was diagnosed with hypoxemic respiratory failure by the clinician and immediately intubated, so ABG data were not available.

**Supplement 2.** Baseline characteristics and outcomes between propensity score-matched patients in HFNC and NPPV groups.

| Variables                              | HFNC (n=22)         | NPPV (n=22)         | p value |
|----------------------------------------|---------------------|---------------------|---------|
| <b>Characteristics</b>                 |                     |                     |         |
| Age, years                             | 75 (64-83)          | 76.5 (65-81)        | 0.888   |
| Male, n                                | 17 (77.3)           | 14 (63.6)           | 0.322   |
| Smoke, n                               | 12 (54.5)           | 8 (36.4)            | 0.226   |
| BMI, kg/m <sup>2</sup>                 | 23.58 (21.26-27.26) | 23.17 (18.47-26.01) | 0.526   |
| APACHE II at ICU admission, point      | 21.5 (17-28)        | 24 (20-28)          | 0.663   |
| Duration of MV before extubation, days | 10 (6-15)           | 9.5 (6-12)          | 0.878   |
| GCS in the day of extubation, score    | 14 (11-15)          | 13.5 (11-15)        | 0.971   |
| <b>Echocardiography</b>                |                     |                     |         |
| LVEF, %                                | 35.4 (25.9-45.6)    | 36.8 (30-41.5)      | 0.963   |
| HFrEF, n                               | 13 (59.1)           | 14 (63.6)           | 0.757   |
| Moderate to severe VHD, n              | 11 (50)             | 12 (54.5)           | 0.763   |
| Pulmonary hypertension, n              | 3 (16.4)            | 4 (18.2)            | >0.99   |
| <b>Comorbidities</b>                   |                     |                     |         |
| Hypertension, n                        | 18 (81.8)           | 17 (77.3)           | >0.99   |
| Coronary artery disease, n             | 14 (63.6)           | 8 (36.4)            | 0.07    |
| Cerebrovascular disease, n             | 5 (22.7)            | 5 (22.7)            | >0.99   |
| Obstructive lung disease, n            | 6 (27.3)            | 6 (27.3)            | >0.99   |
| Diabetes mellitus, n                   | 15 (68.2)           | 13 (59.1)           | 0.531   |
| Chronic kidney disease, n              | 10 (45.5)           | 9 (40.9)            | 0.761   |
| Cancer, n                              | 2 (9.1)             | 2 (9.1)             | >0.99   |

### Weaning parameters

|                           |                  |                   |       |
|---------------------------|------------------|-------------------|-------|
| RSBI, cycles/min/L        | 70.65 (50-89)    | 71 (47-91)        | 0.787 |
| Pimax, cmH2O              | 40 (28-48)       | 40 (32-48)        | 0.972 |
| Pemax, cmH2O              | 42 (32-80)       | 46 (24-72)        | 0.878 |
| Minute ventilation, L/min | 9.22 (6.74-10.4) | 8.47 (6.72-10.58) | 0.833 |

### Diagnosis of admission

|                                      |          |           |       |
|--------------------------------------|----------|-----------|-------|
| Cardiac arrest, n                    | 1 (4.5)  | 0         | >0.99 |
| Pneumonia, n                         | 8 (36.4) | 10 (45.5) | 0.54  |
| Exacerbated COPD, n                  | 1 (4.5)  | 0         | >0.99 |
| Acute decompensated heart failure, n | 4 (18.2) | 7 (31.8)  | 0.296 |
| Acute coronary syndrome, n           | 2(9.1)   | 1 (4.5)   | >0.99 |
| Extrapulmonary sepsis, n             | 3 (13.6) | 2 (9.1)   | >0.99 |
| Cardiac-thoracic surgery, n          | 1 (4.5)  | 1 (4.5)   | >0.99 |
| Others: emergency surgery, n         | 1 (4.5)  | 1 (4.5)   | >0.99 |
| Others, n                            | 1 (4.5)  | 0         | >0.99 |

### Primary outcome

|                                              |          |         |       |
|----------------------------------------------|----------|---------|-------|
| 72-hour therapy failure, n                   | 4 (18.2) | 2 (9.1) | 0.664 |
| Status for treatment failure within 72 hours |          |         | 0.6   |
| Hypoxemia respiratory failure, n             | 1        | 0       |       |
| Hypercapnia respiratory failure, n           | 3        | 1       |       |
| Excessive work of breathing, n               | 0        | 1       |       |

### Secondary outcome

|                                 |          |          |       |
|---------------------------------|----------|----------|-------|
| Reintubation within 72 hours, n | 2 (9.1)  | 2 (9.1)  | >0.99 |
| Reintubation, n                 | 5 (22.7) | 7 (31.8) | 0.498 |

|                               |              |             |        |
|-------------------------------|--------------|-------------|--------|
| ICU length of stay, days      | 14.5 (8-27)  | 12.5 (8-16) | 0.217  |
| Hospital length of stay, days | 23.5 (19-42) | 34 (22-49)  | 0.385  |
| Hospital mortality, n         | 0            | 5 (22.7)    | 0.048* |

Values are mean (standard deviation), median (interquartile range), or number (percentage)

APACHE II, Acute Physiology and Chronic Health Evaluation II; BMI, body mass index; COPD, chronic obstructive pulmonary disease; GCS, Glasgow Coma Scale; HF<sub>r</sub>EF, heart failure with reduced ejection fraction; ICU, intensive care unit; LVEF, left ventricular ejection fraction; MV, mechanical ventilation; P<sub>emax</sub>, maximum expiratory pressure; P<sub>imax</sub>, maximum inspiratory pressure; RSBI, rapid shallow breathing index; VHD, valvular heart disease.

\* p value < 0.05
